# Risks of conservative management in women with ovarian endometriomas undergoing IVF

Edgardo Somigliana<sup>1,\*</sup>, Laura Benaglia<sup>1</sup>, Alessio Paffoni<sup>1</sup>,  
Andrea Busnelli<sup>1,2</sup>, Paola Vigano<sup>3</sup>, and Paolo Vercellini<sup>1,2</sup>

<sup>1</sup>Obstet-Gynecol Dept, Fondazione Ca' Granda, Ospedale Maggiore Policlinico, Milan, Italy <sup>2</sup>Università degli Studi di Milano, Milan, Italy

<sup>3</sup>Obstet-Gynecol Dept, San Raffaele Scientific Institute, Milan, Italy

Correspondence address. Infertility Unit, Fondazione Ca' Granda, Ospedale Maggiore Policlinico, Via M. Fanti, 6, 20122 Milan, Italy.  
Tel: +39-02-55034304; Fax: +39-02-55034302; E-mail: dadosomigliana@yahoo.it

Submitted on November 24, 2014; resubmitted on February 10, 2015; accepted on February 16, 2015

## TABLE OF CONTENTS

- Introduction
- Methods
- Ovarian responsiveness to hyperstimulation
- Oocyte competence
- Technical difficulties during oocyte retrieval
- Infection of the endometrioma
- Follicular fluid contamination with the endometrioma content
- Progression of endometriosis
- Pregnancy complications
- Endometriomas and cancer
  - Missing an occult malignancy at the time of IVF
  - Cancer development after IVF
- Conclusions

**BACKGROUND:** Classical surgical management of endometriotic ovarian cysts using the laparoscopic stripping technique has been recently questioned because of the surgical-related injury to the ovarian reserve. Accordingly, available guidelines suggest that endometriomas with a mean diameter below 4 cm should not be systematically removed before IVF procedures. However, conservative management may have some potential drawbacks and risks. The presence of the endometrioma may theoretically interfere with ovarian responsiveness to hyperstimulation and oocyte competence, the retrieval of the oocytes may be more difficult and risky, the disease may progress during the procedure, pregnancy outcome may be affected and there is the risk of missing occult malignancies with cancer development later in life. In the present review, we aimed at assessing whether these risks do exist and, if so, at estimating their clinical relevance.

**METHODS:** We searched PubMed for articles published in the English language between January 1990 and August 2014 that reported on endometriomas and assisted reproductive techniques. Special care was given to studies reporting data purporting to distinguish the effects of ovarian endometriomas per se from those consequent to surgery for endometriosis or from endometriosis in general.

**RESULTS:** Based on the evidence reviewed in the present study, it can be concluded that conservative management may actually expose women to four of the following theoretical risks, i.e. infection of the endometriomas, follicular fluid contamination with the endometrioma content, higher risk of pregnancy complications and cancer development later in life. The first three conditions do not justify surgery because these events are uncommon and the number of women needed to be treated would be exceedingly high and would not justify the costs and risks of the intervention. Albeit also very rare, the possibility of developing ovarian cancer later in life is more troublesome because it is a life-threatening condition.

However, this alarmism is supported by only one cohort study and this risk can be effectively prevented by postponing surgery until after the IVF programme is concluded or when women have definitely satisfied their reproductive wishes.

**CONCLUSION:** The available evidence on the risks of conservative management does not support systematic surgery before IVF in women with small ovarian endometriomas.

**Key words:** endometriosis / endometrioma / IVF / conservative management / surgery

## Introduction

Classical surgical management of endometriotic ovarian cysts using the laparoscopic stripping technique has been recently questioned because of the overwhelming evidence demonstrating that ovarian reserve may be affected by the intervention. The rate of spontaneous ovulation is lower in operated ovaries (Loh *et al.*, 1999; Candiani *et al.*, 2005; Horikawa *et al.*, 2008), serum levels of anti-Müllerian hormone (AMH) decrease after surgery (Raffi *et al.*, 2012; Somigliana *et al.*, 2012) and responsiveness to ovarian hyperstimulation is reduced (Gupta *et al.*, 2006; Somigliana *et al.*, 2011). The magnitude of this damage is relevant. Based on IVF studies, ovarian responsiveness is halved in operated ovaries (Somigliana *et al.*, 2011) and, most importantly, ovarian reserve is definitely compromised in 13–15% of cases (Busacca *et al.*, 2006; Benaglia *et al.*, 2010). From a clinical perspective, the consequences of surgical mediated damage are mostly unremarkable in unilateral cases since the contralateral intact gonad may properly compensate for the reduced function of the operated one (Demirel *et al.*, 2006; Tsoumpou *et al.*, 2009). In contrast, the damage may become clinically relevant in bilateral cases. Accordingly, in women operated on for bilateral endometriomas, there is a low but definite risk of post-surgical premature ovarian insufficiency (Busacca *et al.*, 2006; Di Prospero and Micucci, 2009), menopause occurs earlier (Coccia *et al.*, 2011) and, in IVF cycles, responsiveness to ovarian hyperstimulation is significantly reduced and the chances of pregnancy are lower (Esinler *et al.*, 2006; Somigliana *et al.*, 2008).

Not surprisingly, we have witnessed during the last decade the spread of conservative management and there is now an increasing agreement that endometriomas, in particular those with a mean diameter below 4 cm, should not be systematically removed before IVF (Garcia-Velasco and Arici, 2004; Garcia-Velasco *et al.*, 2004; Garcia-Velasco and Somigliana, 2009). This recommendation is clearly stated in both the ASRM (American Society of Reproductive Medicine) and the ESHRE (European Society of Human Reproduction and Embryology) currently available guidelines for the management of endometriosis (Practice Committee of the American Society for Reproductive Medicine, 2012; Dunselman *et al.*, 2014). Surgery prior to IVF is an expensive option and exposes women to low but consistent additional risks such as vascular or intestinal injury, infections and anaesthesia-related complications. According to the results of a systematic literature review, major and minor complications occur in, respectively, 1.4 and 7.5% of laparoscopies (Chapron *et al.*, 2002). In the context of women with ovarian endometriomas these rates may be even higher considering that most of them has already been operated, endometriosis is expected to be more advanced and adhesions may be more extended and dense. The conservative approach is also facilitated by the high accuracy of the non-invasive diagnosis of ovarian endometriomas using transvaginal sonography and, in doubtful cases, magnetic resonance imaging (Guerriero *et al.*, 2009; Savelli, 2009; Exacoustos

*et al.*, 2014). In fact, a balanced and shared approach with the women, taking into consideration all the pros and cons of surgery, is currently recommended. This view is clearly advocated in the recent ASRM and ESHRE guidelines for the management of endometriosis (Practice Committee of the ASRM, 2012; Dunselman *et al.*, 2014). As a matter of fact, more and more infertile women with ovarian endometriomas will enter an IVF programme without surgical treatment for the endometriomas.

However, conservative management is not without potential drawbacks and risks. The presence of the endometrioma may interfere with ovarian responsiveness to hyperstimulation and oocyte competence, the retrieval of the oocytes may be more difficult and risky, the disease may progress during the IVF procedure, pregnancy outcome may be affected and there is the risk of missing occult malignancies or causing cancer development later in life (Somigliana *et al.*, 2006; Garcia-Velasco and Somigliana, 2009; Practice Committee of the ASRM, 2012). The overall magnitude of these risks is considered modest but, to our knowledge, a systematic approach to this issue is lacking in the literature. Drawing a clear figure for these risks is crucial in order to properly counsel affected women and to help the physicians in the complex decision-making process. In the present study, we thus performed a systematic review of the literature aimed at assessing whether these risks do exist and, if so, estimating their clinical relevance.

## Methods

We searched PubMed for articles published in the English language between January 1990 and August 2014 using the following MeSH search terms: 'endometrioma' OR 'endometriotic ovarian cyst' OR 'ovarian endometriosis' combined with 'Assisted Reproductive Technology' OR 'ART' OR 'in vitro fertilization' OR 'IVF' OR 'intracytoplasmic sperm injection' OR 'ICSI' with restriction to the human species. Data were extracted independently by four investigators (L.B., E.S., A.B. and A.P.) who also performed an initial screening of the title and abstract of all articles to exclude citations deemed irrelevant to all observers. A manual search of review articles and cross references completed the search. Data presented exclusively as abstracts in national and international meetings were also excluded. Special care was given to studies reporting data purporting to distinguish the effects of ovarian endometriomas *per se* from those consequent to surgery for endometriosis or from endometriosis in general. A binomial distribution model was used to estimate the 95% confidence interval (95% CI) of proportions.

## Ovarian responsiveness to hyperstimulation

IVF outcome in women with ovarian endometriosis has been extensively studied (Gupta *et al.*, 2006; Tsoumpou *et al.*, 2009; Harb *et al.*, 2013). All the available studies and meta-analyses are however exposed to significant confounders. Most of the available contributions included both

previously operated and non-operated women, do not distinguish women with unilateral and bilateral endometriomas and used as controls infertile women with non-endometriosis indications for IVF. These inaccuracies significantly affect the results and, to date, definite conclusions from the available meta-analyses are difficult to draw.

However, the literature offers some wise, even if less considered, contributions that are more enlightening in the context of this review. In particular, studying never operated women with unilateral endometriomas undergoing IVF is a valuable model to reliably investigate the detrimental effects of these cysts on the responsiveness to ovarian hyperstimulation. Comparing ovarian responsiveness in the affected ovary and in the contralateral intact gonad protects the findings from several confounders, such as age, regimen of stimulation and drug dosage, since each eligible woman provides both a case (the affected ovary) and a control (the contralateral intact gonad). Moreover, this study design also offers the possibility to use paired statistical analyses that are more efficient.

We identified seven studies in the literature evaluating ovarian responsiveness to hyperstimulation in never operated women with unilateral endometriomas (Somigliana et al., 2006; Almog et al., 2011; Benaglia et al., 2011; Esinler et al., 2012; Ashrafi et al., 2014; Coccia et al., 2014; Filippi et al., 2014) (Table I). Three studies were prospective (Ashrafi et al., 2014; Coccia et al., 2014; Filippi et al., 2014). None of them documented significant differences in terms of ovarian responsiveness (Table I). Some differences however emerged when including more than one cycle per woman (Somigliana et al., 2006), when exclusively focussing on the larger follicles (Coccia et al., 2014) or the oocytes retrieved (Coccia et al., 2014).

A possible limitation of the available evidence is that most studies included women with relatively small endometriomas. Evidence from women with larger lesions is thus required. On the other hand, it has to be underlined that, in four of these studies, some sub-analyses were drawn to evaluate the impact of the size of the endometriomas. A potential detrimental effect of the dimension of the cyst emerged in two of them (Somigliana et al., 2006; Coccia et al., 2014) but could not be found in the other two (Almog et al., 2011; Benaglia et al., 2011).

Evidence from non-IVF contexts (and thus including larger lesions) is more conflicting but also generally tends to rule out a marked effect of the presence of ovarian endometriomas. On one hand, two studies observed a 1:2 ratio of ovulation between the affected and contralateral

intact gonads in unoperated women with unilateral endometriomas, thus suggesting a possible detrimental effect (Horikawa et al., 2008; Benaglia et al., 2009). On the other hand, five studies reported on preoperative serum AMH in women with endometriomas and four of them did not observe any difference with controls (Kitajima et al., 2011; Streuli et al., 2012; Kim et al., 2013; Somigliana et al., 2014). Only one small study documented lower serum AMH in women with endometriomas (Uncu et al., 2013).

## Oocyte competence

Even if data on ovarian reserve and ovarian responsiveness are reassuring overall, at least in women with endometriomas smaller than 30 mm, there is the need for evidence on the quality of the oocytes that can be retrieved from affected ovaries. Of relevance here is that the ovarian endometriomas have been shown to contain a plethora of factors that can be potentially toxic to the oocytes (Sanchez et al., 2014a). Some of these factors, such as free iron in particular, can actually easily diffuse through the cyst wall and can thus display their toxic effects to the adjacent growing follicles (Sanchez et al., 2014b).

Again, data from women with unilateral endometriomas undergoing IVF may be very informative. Unfortunately, most of the contributions using this study design are retrospective and thus meaningless on this point because oocytes retrieved from affected and unaffected ovaries are typically handled together during the laboratory phase and there is no way to retrospectively obtain independent data. In fact, only two of these studies provide valuable information (Ashrafi et al., 2014; Filippi et al., 2014). Based on data from 37 women, Ashrafi et al. (2014) reported a similar number of oocytes retrieved ( $2.8 \pm 2.4$  and  $3.4 \pm 2.7$ ), mature oocytes ( $2.0 \pm 2.1$  and  $2.3 \pm 2.2$ ), formed embryos ( $1.5 \pm 1.5$  and  $2.0 \pm 1.4$ ) and top quality embryos ( $0.5 \pm 0.5$  and  $0.8 \pm 0.8$ ) from the affected and contralateral intact ovaries, respectively. The rate of maturation was however lower in oocytes from affected gonads (75 versus 87%,  $P = 0.04$ ) but the fertilization rate was similar (72 versus 70%). Filippi et al. compared the embryological development of the oocytes retrieved from the affected ( $n = 91$ ) and contralateral intact ( $n = 103$ ) gonads, respectively, of 29 women and observed that the fertilization rate (64 and 64%), the cleavage rate (58 and 51%) and

**Table I Ovarian responsiveness to hyperstimulation in unoperated women with unilateral endometriomas.**

| Studies                  | No. of cases | Diameter of the cysts (mm) | Outcome*           | Affected ovary | Intact ovary  | P    |
|--------------------------|--------------|----------------------------|--------------------|----------------|---------------|------|
| Somigliana et al. (2006) | 36           | $21 \pm 7$                 | foll. $\geq 16$ mm | $3.2 \pm 2.0$  | $4.1 \pm 2.2$ | n.s. |
| Benaglia et al. (2011)   | 84           | $21 \pm 8$                 | foll. $\geq 11$ mm | 5 (3–7)        | 5 (3–8)       | n.s. |
| Almog et al. (2011)      | 81           | $28 \pm 4$                 | Oocytes            | $6.0 \pm 0.4$  | $6.1 \pm 0.5$ | n.s. |
| Esinler et al. (2012)    | 19           | $22 \pm 5$                 | Oocytes            | $5.9 \pm 4.3$  | $5.4 \pm 3.8$ | n.s. |
| Ashrafi et al. (2014)    | 37           | $<30$ mm                   | foll. $\geq 11$ mm | $7.0 \pm 6.9$  | $6.6 \pm 5.8$ | n.s. |
| Filippi et al. (2014)    | 29           | $25 \pm 9$                 | foll. $\geq 11$ mm | $3.7 \pm 2.4$  | $4.1 \pm 1.7$ | n.s. |
| Coccia et al. (2014)     | 64           | $12$ (19%) $\geq 30$ mm    | foll. $\geq 11$ mm | $5.1 \pm 3.2$  | $5.7 \pm 3.3$ | n.s. |

Data are mean  $\pm$  SD or median (interquartile range).

\*The preferred outcome was the total number of developing follicles (foll.) ( $\geq 11$  mm). If this outcome was not reported alternative outcomes in order of preference were the number of co-dominant follicles ( $\geq 16$  mm) or the number of oocytes retrieved.

Benaglia et al. (2011) and Almog et al. (2011) tested statistical significance using the paired Wilcoxon test and the Mann–Whitney U-test, respectively. All the other contributions applied the paired t-test.

the rate of high quality embryos (31 and 21%) did not significantly differ (Filippi *et al.*, 2014).

A further potentially revealing study design is represented by the study of women with bilateral endometriomas because all the retrieved oocytes are potentially exposed to the detrimental effects of the cysts. Also retrospective studies can be informative here. In fact, two contributions reported on this population and they both referred to women with intact gonads as controls (Reinblatt *et al.*, 2011; Benaglia *et al.*, 2013a). Specifically, Reinblatt *et al.* compared 13 cases and 39 controls retrieving  $11.2 \pm 1.6$  and  $12.3 \pm 1.0$  oocytes, respectively, and showed a similar fertilization rate (66 and 73%), cleavage rate (90 and 98%) and rate of high quality embryos (66 and 75%) (Reinblatt *et al.*, 2011). Benaglia *et al.* (2013a) compared 39 cases and 78 age-matched controls and the number of oocytes retrieved, respectively, differed ( $6.2 \pm 2.6$  versus  $9.6 \pm 4.8$ ,  $P < 0.001$ ) but fertilization rate (77 and 71%) and the rate of high quality embryos (33 and 33%) were similar. Interestingly, even if underpowered to draw definitive conclusions, both studies failed to document any detrimental effects associated with ovarian endometriomas on the chances of pregnancy.

## Technical difficulties during oocyte retrieval

The presence of ovarian endometriomas is thought to increase difficulties during oocytes retrieval. We argue against this common simplistic assumption or, at least, against this semantic assertion. Indeed, the presence of an endometrioma does not hamper oocytes retrieval *per se*. These cysts can be easily traversed if necessary and the follicles behind the endometrioma effectively aspirated. Technical difficulties during oocytes retrieval in women with endometriomas are mainly related to two important and independent aspects. Firstly, the pelvic anatomy is commonly distorted in women with endometriosis. Ovaries are frequently displaced in less accessible locations (such as behind the uterus) and do not slide due to adhesions. In fact, the ovaries cannot always be effectively mobilized and reached. In other words, endometriosis-associated adhesions, and not endometriomas *per se*, hamper accessibility to the ovaries. Secondly, it is commonly believed that all efforts should be made to avoid traversing the endometriomas because of the risk of cyst rupture, contamination of the follicular fluid with the cyst content and endometriomas infection (see below). Aspiration of follicles that developed behind the endometrioma without traversing it may be, in some circumstances, very demanding, if not impossible.

As a matter of fact, traversing the endometrioma is in some cases necessary. This may cause some complications. A first concern here is the risk of *rupture of the endometrioma*. This event can cause sudden severe pain and possibly chemical peritonitis (Huang *et al.*, 2011, 2014). Differential diagnosis is sometimes challenging and, in some cases, women may require emergent surgery. In addition, it cannot be excluded that pelvic adhesions may be worsened following such events as a consequence of the severe inflammatory insult (Fujiwara *et al.*, 2003; Uharcek *et al.*, 2007; Huang *et al.*, 2014). Surprisingly, despite a clear rationale for concern, we failed to identify case reports linking oocyte retrieval to endometrioma rupture in the literature. We have two possible explanations. Firstly, the iatrogenic fissure caused by oocyte retrieval may be more limited than that occurring spontaneously. The hole mainly corresponds to

the diameter of the needle (16–18 gauge) whereas in spontaneous rupture the cyst wall is actually lacerated rather than only punctured. The amount of endometrioma content that can spill into the pelvis is presumably much more limited. It is also likely that, given its small diameter and the density of the endometrioma content, the hole may rapidly close spontaneously through the healing process without causing any significant spillage. Secondly, the iatrogenic perforation that can occur during oocyte retrieval may correspond to an area of dense adhesions between the ovary and the broad ligament or the pouch of Douglas. With the transvaginal approach, the surface of the ovaries that is punctured is indeed more likely to be adherent to the broad ligament, the Douglas pouch or the uterus. Furthermore, the iatrogenic puncture is more likely to cause the spread within the ovarian stroma rather than in the pelvic cavity. As a matter of fact, this spread may self-limit. Overall, it can be speculated that significant spillage within the peritoneal cavity following iatrogenic puncture is unlikely to occur.

A second possible concern is the *injury to adjacent organs* such as, in particular, the intestine. Less likely but other possible sites of injury include the local blood vessels and the ureter. Efforts aimed at reaching a displaced and non-sliding ovary and at avoiding traversing the endometrioma may actually expose women to higher risks. However, as for the rupture of the endometrioma, we failed to detect case reports in the literature. It is however unlikely that this event never occurred. Under-reporting complications in the scientific literature is common and this is even more likely here considering that accidental injury to pelvic organs during oocyte retrieval may be, *prima facie* (but unreasonably), related to unskilfulness. Nonetheless, the lack of evidence in the literature suggests that this risk is, if present, very limited. In this regard, it has also to be noted that injuries determined by needles are generally not severe and may mostly self-resolve. Last, but not least, it is noteworthy that there are no data suggesting that surgery may ameliorate this scenario. Surgery may effectively excise ovarian endometriomas but has not been proved to effectively prevent adhesion reformation or facilitate oocyte retrieval (Somigliana *et al.*, 2011, 2012). Indeed, adhesions may be worsened by surgery. The idea that an operation may facilitate subsequent oocyte retrieval by normalizing the pelvic anatomy lacks supporting evidence and it is likely to be biased.

## Infection of the endometrioma

Infection of ovarian endometriomas following oocyte retrieval has become a main concern for physicians engaged in IVF and endometriosis. In fact, this is currently one of the most claimed motivations in favour of surgery prior to IVF. The bloody content of ovarian endometriomas may indeed serve as an excellent culture medium and may facilitate the spread of infections (Chen *et al.*, 2004). Noteworthy, this can occur also spontaneously, i.e. in the absence of an iatrogenic cause such as oocyte retrieval (Kubota *et al.*, 1997; Chen *et al.*, 2004; Phupong *et al.*, 2004).

The development of endometrioma infection following oocyte retrieval in women with ovarian endometriomas was reported by nine independent authors (Table II) (Padilla, 1993; Yaron *et al.*, 1994; Younis *et al.*, 1997; Den Boon *et al.*, 1999; Matsunaga *et al.*, 2003; Moini *et al.*, 2005; Sharpe *et al.*, 2006; Romero *et al.*, 2013). Overall, 14 cases were described. This complication occurred despite the use of prophylactic antibiotics in at least 11 cases. The endometrioma was reported to be punctured or aspirated at the time of oocyte retrieval in seven cases. The vast majority had pelvic abscesses and required surgery. No

**Table II** Case reports on pelvic infections following oocyte retrieval in women with endometriomas.

| Study                   | Women age (years) | Prophylaxis with antibiotics | Laterality | Endometrioma diameter (cm) | Puncture/aspiration | IVF outcome                                                                                                           | Time from oocytes retrieval <sup>a</sup> | Diagnosis      | Treatment                                                     |
|-------------------------|-------------------|------------------------------|------------|----------------------------|---------------------|-----------------------------------------------------------------------------------------------------------------------|------------------------------------------|----------------|---------------------------------------------------------------|
| Padilla (1993)          | 34                | Yes                          | Unilateral | 2.5                        | Aspirated           | Ongoing pregnancy                                                                                                     | 22 days                                  | Pelvic abscess | Surgical drainage                                             |
| Yaron et al. (1994)     | 38                | Yes                          | n.r.       | n.r.                       | Aspirated           | Not pregnant                                                                                                          | 2 weeks                                  | Pelvic abscess | Unilateral adnexectomy and contralateral drainage             |
| Younis et al. (1997)    | 34                | Yes                          | Bilateral  | 4 (the one aspirated)      | One aspirated       | Not pregnant                                                                                                          | 40 days                                  | Pelvic abscess | Drainage at 1st surgery, bilateral adnexectomy at 2nd surgery |
|                         | 36                | Yes                          | Bilateral  | 5 and 6                    | n.r.                | Not pregnant                                                                                                          | 24 days                                  | Pelvic abscess | Antibiotics and 4 weeks later bilateral adnexectomy           |
|                         | 29                | Yes                          | Bilateral  | 1 and 1.5                  | n.r.                | Normal delivery of a healthy newborn at term                                                                          | 22 days                                  | Pelvic abscess | Antibiotics                                                   |
| Den Boon et al. (1999)  | 36                | Yes                          | Unilateral | 2.2                        | No                  | Twin pregnancy delivered vaginally at 26 weeks: 1 newborn died, one with multiple health problems at 8 months of age. | 25 weeks                                 | Pelvic abscess | Surgical drainage at 25 weeks gestation                       |
| Matsunaga et al. (2003) | 35                | n.r.                         | Unilateral | n.r.                       | n.r.                | Singleton pregnancy ended into spontaneous delivery at 22 weeks (newborn died after birth)                            | 14 weeks                                 | Pelvic abscess | Unilateral adnexectomy                                        |
| Moini et al. (2005)     | n.r.              | Yes                          | Unilateral | 3–4                        | n.r.                | Not pregnant                                                                                                          | n.r.                                     | PID            | n.r.                                                          |
| Tsai et al. (2005)      | n.r.              | No                           | n.r.       | n.r.                       | Aspirated           | n.r.                                                                                                                  | n.r.                                     | Pelvic abscess | Unilateral adnexectomy                                        |
|                         | n.r.              | No                           | n.r.       | n.r.                       | Aspirated           | n.r.                                                                                                                  | n.r.                                     | Pelvic abscess | Surgical drainage                                             |
| Sharpe et al. (2006)    | 35                | Yes                          | Unilateral | 4                          | Aspirated           | Twin pregnancy delivered by CS at 31 weeks                                                                            | 11 weeks                                 | Pelvic abscess | Surgical drainage at the time of CS                           |
| Romero et al. (2013)    | 29                | Yes                          | Bilateral  | n.r.                       | No                  | Not pregnant                                                                                                          | 1 month                                  | Pelvic abscess | Surgical drainage                                             |
|                         | 32                | Yes                          | Unilateral | 3                          | Punctured           | Not pregnant                                                                                                          | 2 months                                 | Pelvic abscess | Surgical drainage                                             |
|                         | 37                | Yes                          | Unilateral | 4                          | No                  | Not pregnant                                                                                                          | 3 weeks                                  | Pelvic abscess | Unilateral adnexectomy                                        |

PID, pelvic inflammatory disease; CS, Caesarean section.

<sup>a</sup>Refers to the time from oocyte retrieval to development of remarkable symptoms.



woman died, but two dramatic pregnancy complications were documented (Table II). Overall, these data indicate that endometrioma infection following oocyte retrieval can indisputably occur and that prophylactic antibiotics may reduce this risk but cannot abolish it. Moreover, it seems reasonable that puncture of the endometrioma is necessary for infection to occur, but this might not be so. In this regard, it has however to be pointed out that all reports were retrospective and it cannot be excluded that in some of them accidental puncture occurred but was not recorded.

The clinical course of endometrioma infection is problematic. Antibiotics may be ineffective because they cannot reach sufficient concentrations within the cysts. These lesions are indeed devoid of blood vessels and the cyst wall may be an effective barrier to the passage of antibiotics in sufficient amount. The oral or intravenous route may not be enough to reach this very fibrotic tissue. As a matter of fact, most cases develop into pelvic abscess and require surgery (Table II). The intervention may be demanding because of the history of previous surgery (most women have already been operated for endometriosis), the presence of endometriosis-related adhesions and the emergency setting. The affected gonads may need to be removed or, if preserved, their reserve of primordial follicles may be severely damaged. An alternative possibility would be to perform transvaginal ultrasound-guided drainage of the ovarian abscess, an option that has been shown to be effective (Gjelland *et al.*, 2005, 2012). However, data on this approach are currently lacking since none of the described cases were treated in this manner (Table II).

From a clinical perspective, it is important to estimate the magnitude of this complication. This may play a crucial role in the balance of pros and cons of surgery when facing affected women requiring IVF. The literature is poorly informative on this point. Noteworthy, the publication of an overall scanty number of cases ( $n = 14$ ) does not allow us to definitely conclude that this event is rare. Indeed, it is unlikely that papers reporting this complication can systematically be published in the scientific literature due to insufficient originality. This may explain why only one study reporting on three cases has been published since 2006 (Romero *et al.*, 2013) despite the fact that the non-surgical approach is gaining consensus. To our knowledge, there are only two studies aimed at estimating the frequency of endometrioma infection following oocyte retrieval (Tsai *et al.*, 2005; Benaglia *et al.*, 2008). Tsai *et al.* (2005) retrospectively reviewed 108 oocyte retrievals performed during a 5-year period and documented two cases, corresponding to 1.9% (95% CI: 0.3–5.8%). The authors speculated that pre-surgical vaginal disinfection with povidone iodine could reduce this risk since both pelvic abscesses were observed in the first study period when this measure was not performed (2 out of 56 cases, corresponding to 3.6%, 95% CI: 0.6–10.8%) and none after its implementation (none out of 52 cases, corresponding to 0.0%, 95% CI: 0.0–5.5%). This difference however did not reach statistical significance. Noteworthy, all women in this study underwent concomitant aspiration of the endometriomas at the time of oocyte retrieval. The second available study aimed at estimating the frequency of pelvic infections in women with endometriomas is a case series from our group (Benaglia *et al.*, 2008). Women with endometriomas undergoing IVF were identified retrospectively and an active follow-up through telephone calls was performed to rule out complications that could be managed in other institutions. Overall, we failed to identify any case of infection out of 214 oocyte retrievals, including cases in which affected ovaries were punctured (189 women). The frequency of this

complication in the whole cohort was thus 0.0% (95% CI: 0.0–1.7%). Unfortunately, the study was not informative on the risk in the subgroup of women with clinically evident endometrioma puncture since this event was recorded in only six women (Benaglia *et al.*, 2008). Prophylactic antibiotics were given in both studies. Taken together, the available evidence suggests that the risk of infection in women with ovarian endometrioma undergoing IVF is very low and should not justify prophylactic surgery. Women should however be informed of this risk, they should receive large spectrum antibiotic prophylaxis and they may be monitored after the oocyte retrieval more carefully. Moreover, the endometriomas should be punctured only if deemed necessary to ensure an appropriate retrieval.

## Follicular fluid contamination with the endometrioma content

Accidental contamination of the follicular fluid with ovarian endometrioma content is a possible complication of oocyte retrieval. In two retrospective separate studies of our group reporting on IVF in the presence of ovarian endometriomas, this event was recorded in 6 out of 214 (2.8%, 95% CI: 1.1–5.6%) and 19 out of 314 (6.1%; 95% CI: 3.8–9.1%) procedures, respectively (Benaglia *et al.*, 2008, 2014). If we combine data from both contributions (corresponding to 25 events out of 528 oocyte retrievals), the frequency would be 4.7% (95% CI: 3.1–6.8%). Independent and, if possible, prospective confirmations of our estimates are however warranted. Retrospective studies are indeed likely to underestimate this complication since this event may not be systematically recorded.

Contamination of the follicular fluid with endometrioma content may affect oocyte competence and embryo development. There is a strong biological rationale to support this assumption. The endometriomas contain a plethora of factors and some of them are expected to be toxic for the oocytes (Sanchez *et al.*, 2014a). They include growing factors such as corticotropin-releasing hormone (CRH) and urocortin (Florio *et al.*, 2007), metalloproteinases (Mizumoto *et al.*, 2002), cytokines such as interleukin (IL)-6, IL-8, vascular endothelial growth factor (VEGF), transforming growth factor (TGF)-beta and tumour necrosis factor (TNF)-alpha (Badawy *et al.*, 1998; Fasciani *et al.*, 2000; Darai *et al.*, 2003) and elevated concentration of free iron (Yamaguchi *et al.*, 2008; Sanchez *et al.*, 2014b). This elevated iron is of particular concern since high concentrations of free iron could mediate the production of reactive oxygen species via the Fenton reaction and could thus induce oxidative stress (Yamaguchi *et al.*, 2008). This latter mechanism may be particularly relevant given the extreme vulnerability of human oocytes to this kind of insult (Devine *et al.*, 2012).

On the other hand, direct evidence on the detrimental effects of follicular fluid contamination is scanty and controversial. In an *in vivo* study in mice, Piromlertamorn *et al.* (2013) observed that the brief exposure of the oocytes to the endometrioma content did not influence embryo development up to the stage of blastocyst but lowered the chances to reach the stage of hatched blastocyst. Evidence from the three available human studies is contradictory. Khamsi *et al.* (2001) compared oocytes that were and were not accidentally exposed to endometrioma content from 14 women and did not show any difference in terms of embryo development. The study did not report on pregnancy rate. Suwajanakorn *et al.* (2001) described 38 women with accidental contamination and

did not show significant differences in terms of quality of oocytes and embryos but a reduced fertilization rate and a lower pregnancy rate was observed. Finally, in a recent study of our group, we compared 19 cases with follicular contamination and 38 matched controls with endometriomas but without contamination and showed that *in vitro* embryo development was improved (fertilization rate and rate of top quality embryos were significantly higher) but pregnancy rate was significantly reduced in cases with follicular contamination (Benaglia et al., 2014). To explain this conflicting information, we speculated that the sublethal stress associated with endometriotic content exposure might apparently improve earlier phases of embryo development while being ultimately detrimental. Noteworthy, it has been shown in animal models that transient exposure of oocytes to moderate conditions of hydrostatic pressure, hyperosmotic milieu, hydrogen peroxide (H<sub>2</sub>O<sub>2</sub>) or heat stress may paradoxically improve embryo development (Pribenszky et al., 2010). This phenomenon was explained by the development of compensatory mechanisms (Pribenszky et al., 2010). This interpretation is however speculative. However, the available conflicting evidence on this issue emerged from very small studies that are inevitably subjected to type II error. In other words, the controversial findings may be simply explained by random fluctuations.

Overall, albeit the evidence is weak and inconsistent, follicular fluid contamination with endometriomas content is uncommon but possible and may be detrimental to the chances of pregnancy. This further strengthens the importance of avoiding inadvertent puncture of ovarian endometriomas. In addition, we advocate some clinical and biological measures to cope with this complication. As soon as the dedicated team becomes aware of follicular fluid contamination, aspiration should be interrupted and the needle should be flushed with oocyte culture media or replaced. Moreover, biologists should promptly separate oocyte-cumulus complexes from the follicular fluid and rinse them (Benaglia et al., 2014).

Finally, despite recognizing the potential detrimental impact of follicular fluid contamination with endometriomas content, it is mandatory to underline that surgery cannot be advocated for this reason. Based on our above-mentioned data showing a 40% relative reduction in live birth rate (from 21 to 12.6%) due to a complication occurring in 6.1% of cases, it can be calculated that the number of women needing to be treated to have one additional live birth would be 195 (Benaglia et al., 2014).

## Progression of endometriosis

An intuitive but poorly investigated concern in women with endometriosis undergoing IVF is the risk of disease progression. Since endometriosis is an estrogen-dependent disease and its development is fuelled by hormonal fluctuations (Burney and Giudice, 2012), one may reasonably speculate that ovarian hyperstimulation during IVF may increase the recurrence or the progression of the disease. Of further and utmost relevance here is that there is growing evidence supporting the view that endometriomas originate from ovulatory events (Vercellini et al., 2010). There are at least three main lines of evidence supporting this pathogenic mechanism. Firstly, two independent authors directly demonstrated the transition from a growing follicle/corpus luteum to an endometrioma using serial transvaginal ultrasounds (Jain and Dalton, 1999; Vercellini et al., 2009a). Secondly, follicular fluid is an excellent culture medium for endometrium growth (Bahtiyar et al., 1998; Somigliana et al., 2001). Thirdly, oral contraceptives have been shown

to almost annul the risk of ovarian endometrioma recurrence after surgery (Seracchioli et al., 2010; Vercellini et al., 2013a). Based on a recent meta-analysis the odds ratio (OR) of endometriomas recurrence is 0.12 (95% CI 0.05–0.29) in oral contraceptive users compared with no-users (Vercellini et al., 2013a).

The available literature actually tends to support a possible detrimental effect of IVF on deep infiltrative peritoneal endometriosis. In fact, nine cases of progression of this type of lesion during IVF treatments have been reported (Renier et al., 1995; Govaerts et al., 1998; Anaf et al., 2000; Van der Houwen et al., 2014a). Obstruction of the intestine, ureter or both occurred in eight, one and one cases, respectively. However, there is no reliable estimate on the magnitude of this risk since the denominator, i.e. the number of women with deep invasive endometriosis undergoing IVF is unknown. On the other hand, the available large case series or cohort studies investigating the impact of IVF on endometriosis progression or recurrences were reassuring (D'Hooghe et al., 2006; Benaglia et al., 2009, 2010, 2011; Coccia et al., 2010; Van der Houwen et al., 2014a). In the context of the present review, one study from our group was particularly enlightening since it specifically reported data on ovarian endometriomas (Benaglia et al., 2009). We prospectively evaluated 48 women with endometriomas who underwent unsuccessful IVF and compared ultrasound findings before and 3–6 months after the procedure. The median (interquartile range) diameter of the 70 studied endometriomas before and after IVF was 20 (18–25) and 21 (17–27) mm, respectively (NS). Formation of new endometriomas was observed in one case (2%, 95% CI: 0–11%) (Benaglia et al., 2009).

Overall, the available data tend to exclude a relevant effect of IVF on endometriosis recurrences in general and ovarian endometriomas in particular. This is somehow surprising given the above-mentioned fundamental role of ovulation in endometriomas formation. One would logically expect the risk to be proportionally related to the number of corpora lutea formed and thus multiple ovulations should significantly enhance the rate of endometrioma formation. Noteworthy, there is evidence that, in contrast to IVF, ovarian hyperstimulation and intrauterine insemination may actually increase the risk of endometrioma recurrence (D'Hooghe et al., 2006; Van der Houwen et al., 2014a,b). On the other hand, it has to be pointed out that ovulation actually does not occur in IVF cycles, since follicular puncture precedes ovulation thus presumably preventing the complex and still unknown mechanisms causing the formation of the endometriomas.

## Pregnancy complications

The relationship between endometriosis and pregnancy outcome is yet debated (Brosens et al., 2007, 2012; Fernando et al., 2009; Hadfield et al., 2009; Stephansson et al., 2009; Benaglia et al., 2012; Vercellini et al., 2012; Conti et al., 2014; Mekaru et al., 2014). Pre-eclampsia or pregnancy-induced hypertension were reported to be increased (Stephansson et al., 2009), decreased (Brosens et al., 2007) or unchanged (Hadfield et al., 2009; Benaglia et al., 2012; Mekaru et al., 2014). The risk of preterm delivery was also controversial, being reported to be either increased (Fernando et al., 2009; Stephansson et al., 2009; Mekaru et al., 2014) or unchanged (Benaglia et al., 2012; Mekaru et al., 2014). Small for gestational age (SGA) was reported to be more frequent (Fernando et al., 2009; Mekaru et al., 2014) or unaffected (Stephansson et al., 2009; Benaglia et al., 2012; Mekaru et al., 2014).

Finally, there is some evidence suggesting an increase in antenatal bleeding/placental complications but this risk would be mainly limited to women with deep infiltrative lesions (Stephansson *et al.*, 2009; Vercellini *et al.*, 2012).

However, we are herein interested in the impact of the presence of ovarian endometriomas rather than endometriosis in general. Specific data on ovarian endometriomas were reported in two studies (Fernando *et al.*, 2009; Benaglia *et al.*, 2012). Fernando *et al.* used the Australian National registries to investigate the impact of endometriosis at the time of using assisted reproductive techniques (ART) on the risk of preterm birth and SGA (Fernando *et al.*, 2009). They documented that women with ovarian endometriomas ( $n = 95$ ) had a statistically significant increased risk of preterm birth when compared with fertile controls ( $n = 1140$ ) (adjusted OR = 2.0, 95% CI: 1.1–3.6) and a statistically significant increased risk of SGA when compared with women without endometriosis undergoing ART ( $n = 1201$ ) (adjusted OR = 2.0, 95% CI: 1.1–3.6). However, estimates in women with or without endometriomas undergoing ART ( $n = 535$ ) were not significantly different (Fernando *et al.*, 2009). Benaglia *et al.* (2012) compared pregnancy outcome between 78 women with endometriomas achieving pregnancy using IVF and 156 age-matched controls without endometriosis also achieving pregnancy through IVF. No statistically significant differences emerged for the live birth rate (adjusted OR = 0.8, 95% CI: 0.4–1.7), preterm birth (adjusted OR = 0.5, 95% CI: 0.1–1.5), SGA (adjusted OR = 0.6, 95% CI: 0.1–2.6) and other obstetrical complications (adjusted OR = 1.9, 95% CI: 0.6–5.7) (Benaglia *et al.*, 2012). Overall, evidence is reassuring but further studies are warranted. The most suitable study design would be to compare IVF pregnancy outcome between women with endometriomas and women with endometriosis but without endometriomas at the time of the procedure.

A rare but serious complication in women with endometriomas achieving pregnancy is the risk of rupture of the cyst during pregnancy. This situation may cause chemical peritonitis and may require immediate surgery. Case reports on this subject are summarized in Table III. This event is undoubtedly rare and this may explain why it was reported in only one case in the two available case series on pregnancy outcome in women with ovarian endometriomas (Ueda *et al.*, 2010; Benaglia *et al.*, 2013b) and was not mentioned in the two controlled studies on women with endometriomas discussed above (Fernando *et al.*, 2009; Benaglia *et al.*, 2012). Importantly, pregnancy outcome was not substantially affected in the reported cases and all women recovered (Table III). The unique demanding case requiring prompt pregnancy termination despite early gestational age was reported by Reif *et al.* (2011). However, in this case, the main reason for delivery was diffuse haemorrhage from the adnexal mass rather than rupture. Discriminating between rupture and haemorrhage is important because surgery may prevent rupture of endometriomas but is presumably less effective for haemorrhage. Of relevance here is that spontaneous haemorrhage during pregnancy is a rare but well-known complication of pregnancy in women with a history of endometriosis and can occur regardless of the presence of endometriomas (Brosens *et al.*, 2012). In fact, the most plausible pathogenic mechanisms of this complication are the progression and local invasion of infiltrative lesions causing blood vessel erosion or tear of vascularized adhesions. Furthermore, also in non-pregnant women, endometrioma rupture is generally associated with severe pain and chemical peritonitis but not haemorrhage (Evangelinakis *et al.*, 2009).

**Table III** Case reports reporting on endometrioma rupture during pregnancy.

| Study                               | Women age (years) | Pregnancy achievement | Singleton-twins | Gestational age | Cyst diameter (mm) | Symptoms          | Concomitant bleeding | Procedure   | Pregnancy course               |
|-------------------------------------|-------------------|-----------------------|-----------------|-----------------|--------------------|-------------------|----------------------|-------------|--------------------------------|
| Vercellini <i>et al.</i> (1992)     | 29                | Natural               | Singleton       | 35 weeks        | 80                 | Acute peritonitis | Absent               | Cystectomy  | Immediate CS (newborn fine)    |
| Loh <i>et al.</i> (1998)            | 25                | Natural               | Singleton       | 6 weeks         | 40                 | Acute peritonitis | Absent               | Cystectomy  | Unaffected                     |
| Gregora and Higgs (1998)            | 40                | Natural               | Singleton       | 18 weeks        | 60                 | Acute peritonitis | Absent               | Cystectomy  | Unaffected                     |
| García-Velasco <i>et al.</i> (1998) | 25                | Natural               | Singleton       | 9 weeks         | 70                 | Acute peritonitis | Absent               | Adnexectomy | Unaffected                     |
| Ueda <i>et al.</i> (2010)           | 35                | ART                   | n.r.            | 2nd trimester   | 61                 | n.r.              | Absent               | Drainage    | Unaffected                     |
| Reif <i>et al.</i> (2011)           | 25                | IVF                   | Twins           | 27 weeks        | n.r.               | Acute peritonitis | Present              | Adnexectomy | Immediate CS (both twins fine) |

n.r., not reported; CS, Caesarean section.



Managing endometriomas in pregnancy may be in some cases clinically demanding for diagnostic reasons. Indeed, endometriomas may rarely undergo decidualization during pregnancy and this may present as rapidly growing cysts with abundantly vascularized intraluminal vegetations (Barbieri et al., 2009; Ueda et al., 2010; Mascilini et al., 2014). Since this is a classical feature of malignancy, surgery may in some cases be necessary to rule out cancer. Differential diagnosis is however possible (Barbieri et al., 2009; Mascilini et al., 2014) and can significantly reduce the number of interventions.

Finally, endometriomas may shrink or disappear after pregnancy. In a recent study of our group on 30 women with 40 endometriomas before IVF and who were scanned after delivery, 16 cysts could not be detected (40%) and we failed to observe any lesion in 11 women (37%) (Benaglia et al., 2013b). Similarly, in a retrospective study conducted on 24 pregnant women with endometriomas, and whose dimensions were recorded during and after pregnancy, Ueda et al. (2010) observed size increase in 4 cases (17%), no changes in 6 cases (25%), size reduction in 12 cases (50%) and disappearance in 2 cases (8%).

## Endometriomas and cancer

Diagnosing an ovarian malignancy in women who recently underwent IVF is dramatic for the patient and her family, and extremely frustrating for the physician. This situation however can occur (Saylam et al., 2006; Woodard et al., 2012). Nonetheless, we believe that this possibility should be considered rationally and should not lead to a blind and potentially harmful clinical attitude consisting of systematic surgery (Vercellini et al., 2009b, 2014). Within the context of the present review, we believe that the discussion should consider two points separately: (i) the risk of missing an occult malignancy at the time of IVF and (ii) the risk of long-term ovarian cancer development from unoperated endometriomas.

### Missing an occult malignancy at the time of IVF

Histology is the only means to rule out malignancies. Unfortunately, biopsy of ovarian endometrioma without its surgical removal is practically unfeasible. Laparoscopy remains the gold standard for a definite diagnosis of endometrioma. On the other hand, transvaginal ultrasound is considered a reliable mean for endometrioma diagnosis (Guerriero et al., 2009; Savelli, 2009). The sensitivity and specificity of transvaginal ultrasound have been reported to be 84–100 and 90–100%, respectively (Savelli, 2009). In inconclusive cases, magnetic resonance effectively discerns between endometriomas and other diagnoses due to its high specificity (98%) (Hottat et al., 2009). Serum CA-125 may be of help but may also complicate the decision-making process. In fact, albeit frequently indicated, the validity of serum CA-125 values has not been proved to reliably discriminate between cysts with and without occult malignancies. First of all, the baseline risk of occult malignancy in ovarian endometriomas should be defined. Two commonly cited large case series suggested that this rate is low but not unremarkable. Mostoufizadeh and Scully (1980) reported eight malignancies out of 950 operated endometriomas (0.8%, 95% CI: 0.4–1.6%) and Stern et al. (2001) identified nine cases out of 1000 specimens (0.9%; 95% CI: 0.4–1.6%). These rates are however an overestimate of the risk of cancer in women with ovarian endometriomas who undergo IVF. Of utmost relevance here is that these two studies were performed on histological

findings. No clinical and sonographic information was provided and it can be reasonably inferred that some of these cases could be suspected before the intervention. In other words, the presumptive preoperative diagnosis sometimes was ovarian malignancy, not endometrioma. Within the focus of the present review, we are indeed interested in the rate of malignancy among women with unremarkable endometriomas detected at ultrasound, not in the rate of malignancy among women with endometriomas in general. Only data on the rate of malignancy in women with unremarkable ovarian endometriomas at ultrasound are clinically important here. This study design was used in a recent contribution of our group in a relatively large sample size of 516 women who were operated on for 874 endometriomas that were unremarkable at preoperative ultrasound (Vercellini et al., 2013b). Specifically, we observed nine specimens with atypical endometriosis and none with occult malignancy. This resulted in a prevalence rate of atypical endometriosis of 1.7% (95% CI: 0.9–3.3%) based on the number of women and 1.0% (95% CI: 0.5–1.9%) based on the number of cysts. The corresponding estimated rates of malignancies were 0% (95% CI: 0.0–0.6%) and 0% (95% CI: 0.0–0.3%), respectively (Vercellini et al., 2013b), thus suggesting that this rate is at least lower than the 0.8–0.9% previously reported. On the other hand, it is mandatory to point out that atypical endometriosis is a potentially relevant condition since this may represent the initial step of the oncogenic process ultimately leading to the development of ovarian cancer later in life (Bedaivy et al., 2009; Vercellini et al., 2013b). Interestingly, in a study focusing on the rate of atypia in endometriosis in general (i.e. including both ovarian and non-ovarian endometriosis), Bedaiwy et al. (2009) observed six cases out of 2000 studied women, corresponding to a rate of 0.3% (95% CI: 0.1–0.6%). Overall, it can be concluded that the risk of missing an occult malignancy is extremely low and with doubtful clinical implications (the number needed to treat (NNT) would be >300 based on our findings) while missing occult atypia may occur and might be of clinical relevance. Conservative management prior to IVF may indeed actually expose a subgroup of women to an increased risk of developing ovarian cancer later in life.

### Cancer development after IVF

Endometriosis is associated with invasive epithelial ovarian cancer and, in particular, with endometrioid and clear cell histotypes (Somigliana et al., 2006; Munksgaard and Blaakaer, 2011; Vercellini et al., 2011; Pearce et al., 2012; Heidemann et al., 2014). Even if a causal relationship is likely (Viganò et al., 2007), the strength of the overall association is however generally modest being below 2 in the vast majority of the available contributions (Somigliana et al., 2006; Munksgaard and Blaakaer, 2011; Pearce et al., 2012; Heidemann et al., 2014). Moreover, confounding is likely in most studies. Data are generally not controlled for parity and oral contraceptives use, two variables that are well known to markedly influence the risk of ovarian cancer and to be differently distributed between women with and without endometriosis. In addition, it is noteworthy that most evidence is obtained in women operated for endometriosis and it can be plausibly expected that active endometriosis is absent following surgery in most of the cases.

The potential causal relationship between endometriosis and ovarian cancer is of particular relevance in the context of the present review considering that IVF may also increase *per se* the risk of ovarian cancer (van Leeuwen et al., 2011; Rizzuto et al., 2013; Stewart et al.,

2013). Unfortunately, there is no cohort study on the risk of ovarian cancer in women with unoperated ovarian endometriomas undergoing IVF. Considering the relative rarity of ovarian cancer (lifetime risk of ~1%), the latency period between exposure and malignancy (most ovarian cancers develop after 50 years of age) and the expected modest magnitude of the association, conclusive contributions on this point are unlikely to be available in the near future. Of further relevance here is that conservative management in women with endometriomas requiring IVF is a relatively new clinical approach. On the other hand, important information can be obtained from studies reporting on unoperated endometriomas, regardless of IVF. To our knowledge, this population was studied in only one prospective cohort study in Japan (Kobayashi *et al.*, 2007) in which the authors detected 46 incident ovarian cancers out of a cohort of 6398 women with unoperated ovarian endometriomas followed-up for up to 17 years. Based on an expected rate of 5.1 cases, the authors calculated a standardized incidence ratio (SIR) of ovarian cancer of 8.9 (95% CI: 4.1–15.3). The risk was higher in the first 8 years after inclusion and in women who were older (>40 years) at recruitment (Kobayashi *et al.*, 2007). This figure is worrying and, if confirmed, would foster the need for surgical removal of ovarian endometriomas once the IVF programme is terminated. On the other hand, as pointed out by Munksgaard and Blaakaer (2011), some of the included cases of this cohort were presumably originally misdiagnosed as endometriomas and not as ovarian cancer. This is supported by the study period and by the lack of a gradient effect with the time of follow-up. The cohort was indeed recruited between 1985 and 1995, a period of time when the currently available accurate diagnostic tools, such as transvaginal sonography in particular, were not systematically available. Moreover, the highest risk was documented soon after diagnosis rather than increasing with time as one would expect. The SIR was indeed 19.3 (95% CI: 6.9–30.6) when considering a period of follow-up <8 years and then subsequently decreased, thus supporting the possibility of misdiagnoses (Kobayashi *et al.*, 2007).

## Conclusions

The potential drawbacks associated with conservative management of ovarian endometriomas prior to IVF and the potential beneficial effects of prophylactic surgery are summarized in Table IV. Overall, two aspects deserve utmost consideration since they may be of practical clinical importance and surgery may prevent them: (i) the risk of endometrioma infection, (ii) the risk of development of ovarian cancer later in life. However, we do not deem these two points sufficiently relevant to claim systematic surgery prior to IVF for the following reasons.

Endometrioma infection up to ovarian abscess development is a demanding situation that requires surgery in most cases. Nevertheless, even if the ovarian reserve of affected ovaries is definitely compromised following this complication, all women facing this complication recovered. Two severe obstetrical complications at advanced gestational age actually occurred (Table II) but an earlier diagnosis might have prevented them. Moreover, the frequency of endometriomas infection is low. As mentioned above, Tsai *et al.* (2005) overall reported two cases out of 108 oocyte retrievals (1.9%, 95% CI: 0.3–5.8%) and in our study (Benaglia *et al.*, 2008) we failed to document any case in 214 oocyte retrievals (0.0%, 95% CI: 0.0–1.7%). Combining data from both sets of evidence turns into two cases out of 322 oocyte retrievals, corresponding to 0.6% (95% CI: 0.1–2.0%). This translates into a NNT of 167. This compares unfavourably with the reported 13–15% rate of definitive damage to the ovarian reserve following surgery (Busacca *et al.*, 2006; Benaglia *et al.*, 2010). In other words, to prevent ovarian infection and subsequent definitive damage to the ovarian reserve in one case, we would cause iatrogenic definitive injury in >22 cases (13/0.6). It has finally to be underlined that this number is likely to be an overestimate since in one of the two studies used to define the risk (Tsai *et al.*, 2005) systematic aspiration of the endometriomas was performed.

The risk of not treating a potential ovarian cancer that could occur later in life because of conservative management is worrying. However, the reported 9-fold increased risk of ovarian cancer documented in

**Table IV** Summary of the evidence on the risks of conservative management of ovarian endometriomas prior to IVF.

| Item                                                         | Theoretical relevance | Demonstrated clinical relevance | Effect of prophylactic surgery |
|--------------------------------------------------------------|-----------------------|---------------------------------|--------------------------------|
| Ovarian responsiveness                                       | ++                    | –                               | Detrimental                    |
| Oocytes competence                                           | ++                    | –                               | Ineffective                    |
| Technical difficulties                                       | +                     | –                               | Doubtful                       |
| Endometrioma rupture                                         | +                     | –                               | Effective                      |
| Injury to adjacent organs                                    | ++                    | –                               | Doubtful                       |
| Infection of the endometrioma                                | ++                    | +                               | Effective                      |
| Follicular fluid contamination with the endometrioma content | +                     | + / –                           | Effective                      |
| Progression of endometriosis                                 | ++                    | –                               | Effective                      |
| Pregnancy complications                                      | ++                    | + / –                           | Doubtful                       |
| Occult malignancy missed                                     | +++                   | –                               | Effective                      |
| Cancer development after IVF                                 | +++                   | +                               | Effective                      |

A judgment is given for the theoretical relevance and for the evidence-based relevance ('demonstrated clinical relevance') for the different points separately. The different issues are judged in a semi-quantitative manner.

A judgement is also given for the potential preventive effects of surgery (effective, doubtful, ineffective or even detrimental).

women with unoperated endometriomas is based on a single study with questionable study design (Kobayashi et al., 2007), and more evidence is warranted to definitely create alarm (Munksgaard and Blaakaer, 2011). Moreover, independently of the risk of ovarian cancer development in unoperated ovarian endometriomas in general, we herein exclusively focus on the need for surgery before IVF. From this perspective, we believe that the risk of malignant transformation of endometriomas is not high enough to justify systematic surgery. Cancerogenesis is a long-standing process and delaying surgery for some months or a few years is unlikely to expose women to a significantly increased risk. Surgery could be considered once the IVF programme is concluded or after delivery. Interestingly, surgery has been shown to be of some benefit in terms of enhancing the chances of natural pregnancy, also in women for whom IVF was unsuccessful (Littman et al., 2005; Vercellini et al., 2014). Moreover, as discussed above, some ovarian endometriomas may disappear following pregnancy (Ueda et al., 2010; Benaglia et al., 2013b).

In conclusion, the available evidence on the risks of conservative management does not support systematic surgery before IVF in women with small ovarian endometriomas. Women should be informed on the potential benefits and harms of surgery and a shared decision should be taken. Within this process, it has to be highlighted to women that, based on the currently available evidence, the risks associated with conservative management are overall modest and do not surmount the risks of surgery-related damage to ovarian reserve and, more in general, the risks and costs of surgery. On the other hand, surgery remains appropriate if pain is a significant concern or if the sonographic aspect of the cyst is not reassuring. Alternative surgical approaches may be more sparing in terms of loss of ovarian reserve. Some recent evidence is encouraging (Donnez et al., 2010; Coric et al., 2011; Var et al., 2011; Ferrero et al., 2012; Zaitoun et al., 2013; Song et al., 2014) but more robust studies and independent confirmations are warranted.

## Authors' roles

E.S., L.B. and P.V. conceived and designed the study. E.S. drafted the first version of the manuscript. A.P. and P.V. systematically retrieved and interpreted the data on the biological aspects. A.B. and L.B. systematically retrieved and interpreted the data on the clinical aspects. P.V. supervised the study. All the authors revised the manuscript.

## Funding

No external funding was either sought or obtained for this study.

## Conflict of interest

None of the authors have any conflict of interest related to the discussed topic to declare.

## References

- Almog B, Shehata F, Sheizaf B, Tan SL, Tulandi T. Effects of ovarian endometrioma on the number of oocytes retrieved for *in vitro* fertilization. *Fertil Steril* 2011; **95**:525–527.
- Anaf IV, El Nakadi I, Simon P, Englert Y, Peny MO, Fayt I, Noel JC. Sigmoid endometriosis and ovarian stimulation. *Hum Reprod* 2000; **15**:790–794.
- Ashrafi M, Fakheri T, Kiani K, Sadeghi M, Akhoond MR. Impact of the endometrioma on ovarian response and pregnancy rate in *in vitro* fertilization cycles. *Int J Fertil Steril* 2014; **8**:29–34.
- Badawy SZ, Cuenca V, Kumar S, Holland J. Effects of chocolate cyst fluid on endometrioma cell growth in culture. *Fertil Steril* 1998; **70**:827–830.
- Bahtiyar MO, Seli E, Oral E, Senturk LM, Zreik TG, Arici A. Follicular fluid of women with endometriosis stimulates the proliferation of endometrial stromal cells. *Hum Reprod* 1998; **13**:3492–3495.
- Barbieri M, Somigliana E, Oneda S, Ossola MW, Acaia B, Fedele L. Decidualized ovarian endometriosis in pregnancy: a challenging diagnostic entity. *Hum Reprod* 2009; **24**:1818–1824.
- Bedaawy MA, Hussein MR, Biscotti C, Falcone T. Pelvic endometriosis is rarely associated with ovarian borderline tumours, cytologic and architectural atypia: a clinicopathologic study. *Pathol Oncol Res* 2009; **15**:81–88.
- Benaglia L, Somigliana E, Iemmello R, Colpi E, Nicolosi AE, Ragni G. Endometrioma and oocyte retrieval-induced pelvic abscess: a clinical concern or an exceptional complication? *Fertil Steril* 2008; **89**:1263–1266.
- Benaglia L, Somigliana E, Vighi V, Nicolosi AE, Iemmello R, Ragni G. Is the dimension of ovarian endometriomas significantly modified by IVF-ICSI cycles? *Reprod Biomed Online* 2009; **18**:401–406.
- Benaglia L, Somigliana E, Vercellini P, Benedetti F, Iemmello R, Vighi V, Santi G, Ragni G. The impact of IVF procedures on endometriosis recurrence. *Eur J Obstet Gynecol Reprod Biol* 2010; **148**:49–52.
- Benaglia L, Somigliana E, Santi G, Scarduelli C, Ragni G, Fedele L. IVF and endometriosis-related symptom progression: insights from a prospective study. *Hum Reprod* 2011; **26**:2368–2372.
- Benaglia L, Bermejo A, Somigliana E, Scarduelli C, Ragni G, Fedele L, Garcia-Velasco JA. Pregnancy outcome in women with endometriomas achieving pregnancy through IVF. *Hum Reprod* 2012; **27**:1663–1667.
- Benaglia L, Bermejo A, Somigliana E, Faulisi S, Ragni G, Fedele L, Garcia-Velasco JA. *In vitro* fertilization outcome in women with unoperated bilateral endometriomas. *Fertil Steril* 2013a; **99**:1714–1719.
- Benaglia L, Somigliana E, Calzolari L, Busnelli A, Cardellicchio L, Ragni G, Fedele L. The vanishing endometrioma: the intriguing impact of pregnancy on small endometriotic ovarian cysts. *Gynecol Endocrinol* 2013b; **29**:863–866.
- Benaglia L, Cardellicchio L, Guarneri C, Paffoni A, Restelli L, Somigliana E, Fedele L. IVF outcome in women with accidental contamination of follicular fluid with endometrioma content. *Eur J Obstet Gynecol Reprod Biol* 2014; **181**:130–134.
- Brosens IA, De Sutter P, Hamerlynck T, Imeraj L, Yao Z, Cloke B, Brosens JJ, Dhont M. Endometriosis is associated with a decreased risk of pre-eclampsia. *Hum Reprod* 2007; **22**:1725–1729.
- Brosens I, Brosens JJ, Fusi L, Al-Sabbagh M, Kuroda K, Benagiano G. Risks of adverse pregnancy outcome in endometriosis. *Fertil Steril* 2012; **98**:30–35.
- Burney RO, Giudice LC. Pathogenesis and pathophysiology of endometriosis. *Fertil Steril* 2012; **98**:511–519.
- Busacca M, Riparini J, Somigliana E, Oggioni G, Izzo S, Vignali M, Candiani M. Postsurgical ovarian failure after laparoscopic excision of bilateral endometriomas. *Am J Obstet Gynecol* 2006; **195**:421–425.
- Candiani M, Barbieri M, Bottani B, Bertulesi C, Vignali M, Agnoli B, Somigliana E, Busacca M. Ovarian recovery after laparoscopic enucleation of ovarian cysts: insights from echographic short-term postsurgical follow-up. *J Minim Invasive Gynecol* 2005; **12**:409–414.
- Chapron C, Fauconnier A, Goffinet F, Bréart G, Dubuisson JB. Laparoscopic surgery is not inherently dangerous for patients presenting with benign gynaecologic pathology. Results of a meta-analysis. *Hum Reprod* 2002; **17**:1334–1342.
- Chen MJ, Yang JH, Yang YS, Ho HN. Increased occurrence of tubo-ovarian abscesses in women with stage III and IV endometriosis. *Fertil Steril* 2004; **82**:498–499.
- Coccia ME, Rizzello F, Gianfranco S. Does controlled ovarian hyperstimulation in women with a history of endometriosis influence recurrence rate? *J Womens Health (Larchmt)* 2010; **19**:2063–2069.
- Coccia E, Rizzello F, Mariani G, Bulletti C, Palagiano A, Scarselli G. Ovarian surgery for bilateral endometriomas influences age at menopause. *Hum Reprod* 2011; **11**:3000–3007.
- Coccia ME, Rizzello F, Barone S, Pinelli S, Rapalini E, Parri C, Caracciolo D, Papageorgiou S, Cima G, Gandini L. Is there a critical endometrioma size associated with reduced ovarian responsiveness in assisted reproduction techniques? *Reprod Biomed Online* 2014; **29**:259–266.

- Conti N, Cevenini G, Vannuccini S, Orlandini C, Valensise H, Gervasi MT, Ghezzi F, Di Tommaso M, Severi FM, Petraglia F. Women with endometriosis at first pregnancy have an increased risk of adverse obstetric outcome. *J Matern Fetal Neonatal Med* 2014;**29**:1–16.
- Coric M, Barisic D, Pavicic D, Karadza M, Banovic M. Electrocoagulation versus suture after laparoscopic stripping of ovarian endometriomas assessed by antral follicle count: preliminary results of randomized clinical trial. *Arch Gynecol Obstet* 2011;**283**:373–378.
- Darai E, Detchev R, Hugol D, Quang NT. Serum and cyst fluid levels of interleukin (IL)-6, IL-8 and tumour necrosis factor-alpha in women with endometriomas and benign and malignant cystic ovarian tumours. *Hum Reprod* 2003;**18**:1681–1685.
- Demirol A, Guven S, Baykal C, Gurgan T. Effect of endometrioma cystectomy on IVF outcome: a prospective randomized study. *Reprod Biomed Online* 2006;**12**:639–643.
- Den Boon J, Kimmel CEJM, Nagel HTC, Van Roosmalen J. Pelvic abscess in the second half of pregnancy after oocyte retrieval for in-vitro fertilization. *Hum Reprod* 1999;**14**:2402–2403.
- Devine PJ, Perreault SD, Luderer U. Roles of reactive oxygen species and antioxidants in ovarian toxicity. *Biol Reprod* 2012;**86**:27.
- Di Prospero F, Micucci G. Is operative laparoscopy safe in ovarian endometriosis? *Reprod Biomed Online* 2009;**18**:16.
- D'Hooghe TM, Denys B, Spiessens C, Meuleman C, Debrock S. Is the endometriosis recurrence rate increased after ovarian hyperstimulation? *Fertil Steril* 2006;**86**:283–290.
- Donnez J, Lousse JC, Jadoul P, Donnez O, Squifflet J. Laparoscopic management of endometriomas using a combined technique of excisional (cystectomy) and ablative surgery. *Fertil Steril* 2010;**94**:28–32.
- Dunselman GA, Vermeulen N, Becker C, Calhaz-Jorge C, D'Hooghe T, De Bie B, Heikinheimo O, Horne AW, Kiesel L, Nap A et al. ESHRE guideline: management of women with endometriosis. *Hum Reprod* 2014;**29**:400–412.
- Esinler I, Bazdag G, Aybar F, Bayar U, Yarali H. Outcome of *in vitro* fertilization/ intracytoplasmic sperm injection after laparoscopic cystectomy for endometriomas. *Fertil Steril* 2006;**85**:1730–1735.
- Esinler I, Bozdogan G, Arkan I, Demir B, Yarali H. Endometrioma  $\leq 3$  cm in diameter per se does not affect ovarian reserve in intracytoplasmic sperm injection cycles. *Gynecol Obstet Invest* 2012;**74**:261–264.
- Evangelinakis N, Grammatikakis I, Salamalekis G, Tziortzioti V, Samaras C, Chrelias C, Kassanos D. Prevalence of acute hemoperitoneum in patients with endometriotic ovarian cysts: a 7-year retrospective study. *Clin Exp Obstet Gynecol* 2009;**36**:254–255.
- Exacoustos C, Manganaro L, Zupi E. Imaging for the evaluation of endometriosis and adenomyosis. *Best Pract Res Clin Obstet Gynaecol* 2014;**28**:655–681.
- Fasciani A, D'Ambrogio G, Bocci G, Monti M, Genazzani AR, Artini PG. High concentrations of the vascular endothelial growth factor and interleukin-8 in ovarian endometriomata. *Mol Hum Reprod* 2000;**6**:50–54.
- Fernando S, Breheny S, Jaques AM, Halliday JL, Baker G, Healy D. Preterm birth, ovarian endometriomata, and assisted reproduction technologies. *Fertil Steril* 2009;**91**:325–330.
- Ferrero S, Venturini PL, Gillott DJ, Remorgida V, Leone Roberti Maggiore U. Hemostasis by bipolar coagulation versus suture after surgical stripping of bilateral ovarian endometriomas: a randomized controlled trial. *J Minim Invasive Gynecol* 2012;**19**:722–730.
- Filippi F, Benaglia L, Paffoni A, Restelli L, Vercellini P, Somigliana E, Fedele L. Ovarian endometriomas and oocyte quality: insights from *in vitro* fertilization cycles. *Fertil Steril* 2014;**10**:988–993.
- Florio P, Reis FM, Torres PB, Calonaci F, Toti P, Bocchi C, Linton EA, Petraglia F. Plasma urocortin levels in the diagnosis of ovarian endometriosis. *Obstet Gynecol* 2007;**110**:594–600.
- Fujiwara H, Kosaka K, Hamanishi S, Hiraka J, Higuchi T, Tatsumi K, Yoshioka S, Fujii S. Acute elevation of plasma D-dimer levels associated with rupture of an ovarian endometriotic cyst: case report. *Hum Reprod* 2003;**18**:338–341.
- Garcia-Velasco JA, Arici A. Surgery for the removal of endometriomas before *in vitro* fertilization does not increase implantation and pregnancy rates. *Fertil Steril* 2004;**81**:1206.
- Garcia-Velasco JA, Somigliana E. Management of endometriomas in women requiring IVF: to touch or not to touch. *Hum Reprod* 2009;**24**:496–501.
- García-Velasco JA, Alvarez M, Palumbo A, González-González A, Ordás J. Rupture of an ovarian endometrioma during the first trimester of pregnancy. *Eur J Obstet Gynecol Reprod Biol* 1998;**76**:41–43.
- Garcia-Velasco JA, Mahutte NG, Corona J, Zúñiga V, Gilés J, Arici A, Pellicer A. Removal of endometriomas before *in vitro* fertilization does not improve fertility outcomes: a matched, case-control study. *Fertil Steril* 2004;**81**:1194–1197.
- Gjelland K, Ekerhovd E, Granberg S. Transvaginal ultrasound-guided aspiration for treatment of tubo-ovarian abscess: a study of 302 cases. *Am J Obstet Gynecol* 2005;**193**:1323–1330.
- Gjelland K, Granberg S, Kiserud T, Wentzel-Larsen T, Ekerhovd E. Pregnancies following ultrasound-guided drainage of tubo-ovarian abscess. *Fertil Steril* 2012;**98**:136–140.
- Govaerts I, Devreker F, Delbaere A, Revelard P, Englert Y. Short-term medical complications of 1500 oocyte retrievals for *in vitro* fertilization and embryo transfer. *Eur J Obstet Gynecol Reprod Biol* 1998;**77**:239–243.
- Gregora M, Higgs P. Endometriomas in pregnancy. *Aust N Z J Obstet Gynaecol* 1998;**38**:106–109.
- Guerriero S, Alcazar JL, Pascual MA, Ajossa S, Gerada M, Bargellini R, Virgilio B, Melis GB. Diagnosis of the most frequent benign ovarian cysts: is ultrasonography accurate and reproducible? *J Womens Health (Larchmt)* 2009;**18**:519–527.
- Gupta S, Agarwal A, Agarwal R, Loret de Mola JR. Impact of ovarian endometrioma on assisted reproduction outcomes. *Reprod Biomed Online* 2006;**13**:349–360.
- Hadfield RM, Lain SJ, Raynes-Greenow CH, Morris JM, Roberts CL. Is there an association between endometriosis and the risk of pre-eclampsia? A population based study. *Hum Reprod* 2009;**24**:2348–2352.
- Harb HM, Gallos ID, Chu J, Harb M, Coomarasamy A. The effect of endometriosis on *in vitro* fertilisation outcome: a systematic review and meta-analysis. *BJOG* 2013;**120**:1308–1320.
- Heidemann LN, Hartwell D, Heidemann CH, Jochimsen KM. The relation between endometriosis and ovarian cancer - a review. *Acta Obstet Gynecol Scand* 2014;**93**:20–31.
- Horikawa T, Nakagawa K, Ohgi S, Kojima R, Nakashima A, Ito M, Takahashi Y, Saito H. The frequency of ovulation from the affected ovary decreases following laparoscopic cystectomy in infertile women with unilateral endometrioma during a natural cycle. *J Assist Reprod Genet* 2008;**25**:239–244.
- Hottat N, Larrousse C, Anaf V, Noël JC, Matos C, Absil J, Metens T. Endometriosis: contribution of 3.0-T pelvic MR imaging in preoperative assessment—initial results. *Radiology* 2009;**253**:126–134.
- Huang YH, Liou JD, Hsieh CL, Shiau CS, Lo LM, Chang MY. Long-term follow-up of patients surgically treated for ruptured ovarian endometriotic cysts. *Taiwan J Obstet Gynecol* 2011;**50**:306–311.
- Huang YH, Hsieh CL, Shiau CS, Lo LM, Liou JD, Chang MY. Suitable timing of surgical intervention for ruptured ovarian endometrioma. *Taiwan J Obstet Gynecol* 2014;**53**:220–223.
- Jain S, Dalton ME. Chocolate cysts from ovarian follicles. *Fertil Steril* 1999;**72**:852–856.
- Khamsi F, Yavas Y, Lacanna IC, Roberge S, Endman M, Wong JC. Exposure of human oocytes to endometrioma fluid does not alter fertilization or early embryo development. *J Assist Reprod Genet* 2001;**18**:106–109.
- Kim JY, Jee BC, Suh CS, Kim SH. Preoperative serum anti-müllerian hormone level in women with ovarian endometrioma and mature cystic teratoma. *Yonsei Med J* 2013;**54**:921–926.
- Kitajima M, Khan KN, Hiraki K, Inoue T, Fujishita A, Masuzaki H. Changes in serum anti-Müllerian hormone levels may predict damage to residual normal ovarian tissue after laparoscopic surgery for women with ovarian endometrioma. *Fertil Steril* 2011;**95**:2589–2591.
- Kobayashi H, Sumimoto K, Moniwa N, Imai M, Takakura K, Kuromaki T, Morioka E, Arisawa K, Terao T. Risk of developing ovarian cancer among women with ovarian endometrioma: a cohort study in Shizuoka, Japan. *Int J Gynecol Cancer* 2007;**17**:37–43.
- Kubota T, Ishi K, Takeuchi H. A study of tubo-ovarian and ovarian abscesses, with a focus on cases with endometrioma. *J Obstet Gynaecol Res* 1997;**23**:421–426.
- Littman E, Giudice L, Lathi R, Berker B, Milki A, Nezhat C. Role of laparoscopic treatment of endometriosis in patients with failed *in vitro* fertilization cycles. *Fertil Steril* 2005;**84**:1574–1578.
- Loh FH, Chua SP, Khalil R, Ng SC. Case report of ruptured endometriotic cyst in pregnancy treated by laparoscopic ovarian cystectomy. *Singapore Med J* 1998;**39**:368–369.
- Loh FH, Tan AT, Kumar J, Ng SC. Ovarian response after laparoscopic ovarian cystectomy for endometriotic cysts in 132 monitored cycles. *Fertil Steril* 1999;**72**:316–321.
- Mascilini F, Moruzzi C, Giansiracusa C, Guastafierro F, Savelli L, De Meis L, Epstein E, Timor-Tritsch IE, Mailath-Pokorny M, Ercoli A et al. Imaging in gynecological



- disease. IO: clinical and ultrasound characteristics of decidualized endometriomas surgically removed during pregnancy. *Ultrasound Obstet Gynecol* 2014; **44**:354–360.
- Matsunaga Y, Fukushima K, Nozaki M, Nakanami N, Kawano Y, Shigematsu T, Satoh S, Nakano H. A case of pregnancy complicated by the development of a tubo-ovarian abscess following *in vitro* fertilization and embryo transfer. *Am J Perinatol* 2003; **20**:277–282.
- Mekaru K, Masamoto H, Sugiyama H, Asato K, Heshiki C, Kinjyo T, Aoki Y. Endometriosis and pregnancy outcome: are pregnancies complicated by endometriosis a high-risk group? *Eur J Obstet Gynecol Reprod Biol* 2014; **172**: 36–39.
- Mizumoto H, Saito T, Ashihara K, Nishimura M, Takehara M, Tanaka R, Ito E, Kudo R. Expression of matrix metalloproteinases in ovarian endometriomas: immunohistochemical study and enzyme immunoassay. *Life Sci* 2002; **71**:259–273.
- Moini A, Riaz K, Amid V, Ashrafi M, Tehraninejad E, Madani T, Owji M. Endometriosis may contribute to oocyte retrieval-induced pelvic inflammatory disease: report of eight cases. *J Assist Reprod Genet* 2005; **22**:307–309.
- Mostoufzadeh M, Scully RE. Malignant tumors arising in endometriosis. *Clin Obstet Gynecol* 1980; **23**:951–963.
- Munksgaard PS, Blaakaer J. The association between endometriosis and gynecological cancers and breast cancer: a review of epidemiological data. *Gynecol Oncol* 2011; **123**:157–163.
- Padilla SL. Ovarian abscess following puncture of an endometrioma during ultrasound-guided oocyte retrieval. *Hum Reprod* 1993; **8**:1282–1283.
- Pearce CL, Templeman C, Rossing MA, Lee A, Near AM, Webb PM, Nagle CM, Doherty JA, Cushing-Haugen KL, Wicklund KG et al. Association between endometriosis and risk of histological subtypes of ovarian cancer: a pooled analysis of case-control studies. *Lancet Oncol* 2012; **13**:385–394.
- Phupong V, Rungruxsirivorn T, Tantbirojn P, Triratanachai S, Vasuratna A. Infected endometrioma in pregnancy masquerading as acute appendicitis. *Arch Gynecol Obstet* 2004; **269**:219–220.
- Piromlertamorn W, Saeng-Anan U, Vutyavanich T. Effects of ovarian endometriotic fluid exposure on fertilization rate of mouse oocytes and subsequent embryo development. *Reprod Biol Endocrinol* 2013; **11**:4.
- Practice Committee of the American Society for Reproductive Medicine. Endometriosis and infertility: a committee opinion. *Fertil Steril* 2012; **98**:591–598.
- Pribenszky C, Vajta G, Molnar M, Du Y, Lin L, Bolund L, Yovich J. Stress for stress tolerance? A fundamentally new approach in mammalian embryology. *Biol Reprod* 2010; **83**:690–697.
- Raffi F, Metwally M, Amer S. The impact of excision of ovarian endometrioma on ovarian reserve: a systematic review and meta-analysis. *J Clin Endocrinol Metab* 2012; **97**:3146–3154.
- Reif P, Schöll W, Klaritsch P, Lang U. Rupture of endometriotic ovarian cyst causes acute hemoperitoneum in twin pregnancy. *Fertil Steril* 2011; **95**:2125.
- Reinblatt SL, Ishai L, Shehata F, Son WY, Tulandi T, Almog B. Effects of ovarian endometrioma on embryo quality. *Fertil Steril* 2011; **95**:2700–2702.
- Renier M, Verheyden B, Termote L. An unusual coincidence of endometriosis and ovarian stimulation. *Eur J Obstet Gynecol Reprod Biol* 1995; **63**:187–189.
- Rizzuto I, Behrens RF, Smith LA. Risk of ovarian cancer in women treated with ovarian stimulating drugs for infertility. *Cochrane Database Syst Rev* 2013; **13**: CD008215.
- Romero B, Aibar L, Martínez Navarro L, Fontes J, Calderón MA, Mozas J. Pelvic abscess after oocyte retrieval in women with endometriosis: a case series. *Iran J Reprod Med* 2013; **11**:677–680.
- Sanchez AM, Viganò P, Somigliana E, Panina-Bordignon P, Vercellini P, Candiani M. The distinguishing cellular and molecular features of the endometriotic ovarian cyst: from pathophysiology to the potential endometrioma-mediated damage to the ovary. *Hum Reprod Update* 2014a; **20**:217–230.
- Sanchez AM, Papaleo E, Corti L, Santambrogio P, Levi S, Viganò P, Candiani M, Panina-Bordignon P. Iron availability is increased in individual human ovarian follicles in close proximity to an endometrioma compared with distal ones. *Hum Reprod* 2014b; **29**:577–583.
- Savelli L. Transvaginal sonography for the assessment of ovarian and pelvic endometriosis: how deep is our understanding? *Ultrasound Obstet Gynecol* 2009; **33**:497–501.
- Saylam K, Devreker F, Simon P, Fayt I, Noël JC. Ovarian clear cell carcinoma occurring in a young patient with endometriosis and long-term ovulation stimulations. *Acta Obstet Gynecol Scand* 2006; **85**:1506–1507.
- Seracchioli R, Mabrouk M, Frascà C, Manuzzi L, Montanari G, Keramyda A, Venturoli S. Long-term cyclic and continuous oral contraceptive therapy and endometrioma recurrence: a randomized controlled trial. *Fertil Steril* 2010; **93**:52–56.
- Sharpe K, Karovitch AJ, Claman P, Suh KN. Transvaginal oocyte retrieval for *in vitro* fertilization complicated by ovarian abscess during pregnancy. *Fertil Steril* 2006; **86**:11–13.
- Somigliana E, Viganò P, La Sala GB, Balasini M, Candiani M, Incerti L, Busacca M, Vignali M. Follicular fluid as a favourable environment for endometrial and endometriotic cell growth *in vitro*. *Hum Reprod* 2001; **16**:1076–1080.
- Somigliana E, Viganò P, Parazzini F, Stoppelli S, Giambattista E, Vercellini P. Association between endometriosis and cancer: a comprehensive review and a critical analysis of clinical and epidemiological evidence. *Gynecol Oncol* 2006; **101**:331–341.
- Somigliana E, Arnoldi M, Benaglia L, Iemmello R, Nicolosi AE, Ragni G. IVF-ICSI outcome in women operated on for bilateral endometriomas. *Hum Reprod* 2008; **23**:1526–1530.
- Somigliana E, Benaglia L, Viganò P, Candiani M, Vercellini P, Fedele L. Surgical measures for endometriosis-related infertility: a plea for research. *Placenta* 2011; **32**:S238–S242.
- Somigliana E, Viganò P, Benaglia L, Busnelli A, Vercellini P, Fedele L. Adhesion prevention in endometriosis: a neglected critical challenge. *J Minim Invasive Gynecol* 2012; **19**:415–421.
- Somigliana E, Marchese MA, Frattaruolo MP, Berlanda N, Fedele L, Vercellini P. Serum anti-müllerian hormone in reproductive aged women with benign ovarian cysts. *Eur J Obstet Gynecol Reprod Biol* 2014; **180**:142–147.
- Song T, Lee SH, Kim WY. Additional benefit of hemostatic sealant in preservation of ovarian reserve during laparoscopic ovarian cystectomy: a multi-center, randomized controlled trial. *Hum Reprod* 2014; **29**:1659–1665.
- Stephansson O, Kieler H, Granath F, Falconer H. Endometriosis, assisted reproduction technology, and risk of adverse pregnancy outcome. *Hum Reprod* 2009; **24**:2341–2347.
- Stern RC, Dash R, Bentley RC, Snyder MJ, Haney AF, Robboy SJ. Malignancy in endometriosis: frequency and comparison of ovarian and extraovarian types. *Int J Gynecol Pathol* 2001; **20**:133–139.
- Stewart LM, Holman CD, Finn JC, Preen DB, Hart R. *In vitro* fertilization is associated with an increased risk of borderline ovarian tumours. *Gynecol Oncol* 2013; **129**:372–376.
- Streuli I, de Ziegler D, Gayet V, Santulli P, Bijaoui G, de Mouzon J, Chapron C. In women with endometriosis anti-Müllerian hormone levels are decreased only in those with previous endometrioma surgery. *Hum Reprod* 2012; **27**:3294–3303.
- Suwajanakorn S, Pruksananonda K, Sereepapong W, Ahnongkitpanit V, Chompurat D, Boonkasemsanti W, Virutamasen P. Effects of contaminated endometriotic contents on quality of oocytes. *J Med Assoc Thai* 2001; **84**:S371–S376.
- Tsai YC, Lin MY, Chen SH, Chung MT, Loo TC, Huang KF, Lin LY. Vaginal disinfection with povidone iodine immediately before oocyte retrieval is effective in preventing pelvic abscess formation without compromising the outcome of IVF-ET. *J Assist Reprod Genet* 2005; **22**:173–175.
- Tsoumpou I, Kyrgiou M, Gelbaya TA, Nardo LG. The effect of surgical treatment for endometrioma on *in vitro* fertilization outcomes: a systematic review and meta-analysis. *Fertil Steril* 2009; **92**:75–87.
- Ueda Y, Enomoto T, Miyatake T, Fujita M, Yamamoto R, Kanagawa T, Shimizu H, Kimura T. A retrospective analysis of ovarian endometriosis during pregnancy. *Fertil Steril* 2010; **94**:78–84.
- Uharcek P, Mlynček M, Ravinger J. Elevation of serum CA 125 and D-dimer levels associated with rupture of ovarian endometrioma. *Int J Biol Markers* 2007; **22**:203–205.
- Uncu G, Kasapoglu I, Ozerkan K, Seyhan A, Oral Yilmaztepe A, Ata B. Prospective assessment of the impact of endometriomas and their removal on ovarian reserve and determinants of the rate of decline in ovarian reserve. *Hum Reprod* 2013; **28**:2140–2145.
- van der Houwen LE, Mijatovic V, Leemhuis E, Schats R, Heymans MW, Lambalk CB, Hompes PG. Efficacy and safety of IVF/ICSI in patients with severe endometriosis after long-term pituitary down-regulation. *Reprod Biomed Online* 2014a; **28**:39–46.
- van der Houwen LE, Schreurs AM, Schats R, Heymans MW, Lambalk CB, Hompes PG, Mijatovic V. Efficacy and safety of intrauterine insemination in patients with moderate-to-severe endometriosis. *Reprod Biomed Online* 2014b; **28**:590–598.
- van Leeuwen FE, Klip H, Mooij TM, van de Swaluw AM, Lambalk CB, Kortman M, Laven JS, Jansen CA, Helmerhorst FM, Cohlen BJ et al. Risk of borderline and invasive ovarian tumours after ovarian stimulation for *in vitro* fertilization in a large Dutch cohort. *Hum Reprod* 2011; **26**:3456–3465.



- Var T, Batioglu S, Tonguc E, Kahyaoglu I. The effect of laparoscopic ovarian cystectomy versus coagulation in bilateral endometriomas on ovarian reserve as determined by antral follicle count and ovarian volume: a prospective randomized study. *Fertil Steril* 2011;**95**:2247–2250.
- Vercellini P, Ferrari A, Vendola N, Carinelli SG. Growth and rupture of an ovarian endometrioma in pregnancy. *Int J Gynaecol Obstet* 1992;**37**:203–205.
- Vercellini P, Somigliana E, Viganò P, Abbiati A, Barbara G, Fedele L. 'Blood On The Tracks' from corpora lutea to endometriomas. *BJOG* 2009a;**116**:366–371.
- Vercellini P, Parazzini F, Somigliana E, Viganò P, Bolis G, Fedele L. The endometriosis-ovarian cancer connection: the case against preventive surgery. *Fertil Steril* 2009b;**91**:e37.
- Vercellini P, Somigliana E, Viganò P, De Matteis S, Barbara G, Fedele L. Post-operative endometriosis recurrence: a plea for prevention based on pathogenetic, epidemiological and clinical evidence. *Reprod Biomed Online* 2010;**21**:259–265.
- Vercellini P, Crosignani P, Somigliana E, Viganò P, Buggio L, Bolis G, Fedele L. The 'incessant menstruation' hypothesis: a mechanistic ovarian cancer model with implications for prevention. *Hum Reprod* 2011;**26**:2262–2273.
- Vercellini P, Parazzini F, Pietropaolo G, Cipriani S, Frattaruolo MP, Fedele L. Pregnancy outcome in women with peritoneal, ovarian and rectovaginal endometriosis: a retrospective cohort study. *BJOG* 2012;**119**:1538–1543.
- Vercellini P, DE Matteis S, Somigliana E, Buggio L, Frattaruolo MP, Fedele L. Long-term adjuvant therapy for the prevention of postoperative endometriomas recurrence: a systematic review and meta-analysis. *Acta Obstet Gynecol Scand* 2013a;**92**:8–16.
- Vercellini P, Cribiù FM, Del Gobbo A, Carcangiu ML, Somigliana E, Bösari S. The oncofetal protein IMP3: a novel biomarker and triage tool for premalignant atypical endometriotic lesions. *Fertil Steril* 2013b;**99**:1974–1979.
- Vercellini P, Viganò P, Somigliana E, Fedele L. Endometriosis: pathogenesis and treatment. *Nat Rev Endocrinol* 2014;**10**:261–275.
- Viganò P, Somigliana E, Parazzini F, Vercellini P. Bias versus causality: interpreting recent evidence of association between endometriosis and ovarian cancer. *Fertil Steril* 2007;**88**:588–593.
- Woodard TL, Awonuga AO, Puscheck E. Malignant transformation of endometrioma in a woman with a history of ovulation induction and *in vitro* fertilization. *Case Rep Med* 2012;**2012**:497362.
- Yamaguchi K, Mandai M, Toyokuni S, Hamanishi J, Higuchi T, Takakura K, Fujii S. Contents of endometriotic cysts, especially the high concentration of free iron, are a possible cause of carcinogenesis in the cysts through the iron-induced persistent oxidative stress. *Clin Cancer Res* 2008;**14**:32–40.
- Yaron Y, Peyser MR, Samuel D, Amit A, Lessing JB. Infected endometriotic cysts secondary to oocyte aspiration for in-vitro fertilization. *Hum Reprod* 1994;**9**:1759–1760.
- Younis JS, Ezra Y, Laufer N, Ohel G. Late manifestation of pelvic abscess following oocyte retrieval, for *in vitro* fertilization, in patients with severe endometriosis and ovarian endometriomata. *J Assist Reprod Genet* 1997;**14**:343–346.
- Zaitoun MM, Zaitoun MM, El Behery MM. Comparing long term impact on ovarian reserve between laparoscopic ovarian cystectomy and open laparotomy for ovarian endometrioma. *J Ovarian Res* 2013;**6**:76.
